# Supplementary material for: Sequence Analysis and Functional Verification of the Effects of Three Key Structural Genes, PdTHC2’GT, PdCHS and PdCHI, on the Isosalipurposide Synthesis Pathway in Paeonia delavayi var. lutea
Source: MDPI journal article supplement (doi:10.3390/ijms23105696), 2022-05-19
Supplement: s1 [file s1]

Table S3 Primers used for fusing GFP and pCAMBIA1302

| Gene               | primer(5' - 3')                           | Restriction<br>Enzyme<br>cutting site | Description              |
|--------------------|-------------------------------------------|---------------------------------------|--------------------------|
| <i>PdCHS-F</i>     | tctctctcaagcttggatccATGGCTTCAGTTGAAGAAAT  | BamHI                                 | Subcellular localization |
| <i>PdCHS-R</i>     | cgggtcatgagctcctgcagCTCACTGATTGTAATTGCAG  | PstI                                  | Subcellular localization |
| <i>PdTHC2'GT-F</i> | tctctctcaagcttggatccATGACGAAAGCAGAGTTAGTC | BamHI                                 | Subcellular localization |
| <i>PdTHC2'GT-R</i> | cgggtcatgagctcctgcagGGGCATATTTGTATGACGTC  | PstI                                  | Subcellular localization |
| <i>PdCHI-F</i>     | tctctctcaagcttggatccATGGGTACTGAACAGGTAAT  | BamHI                                 | Subcellular localization |
| <i>PdCHI-R</i>     | cgggtcatgagctcctgcagATAGTCATTTGTAGATAACT  | PstI                                  | Subcellular localization |
| <i>PdCHS-F</i>     | gaacacgggggactcttgacATGGCTTCAGTTGAAGAAAT  | NcoI                                  | stable transformation    |
| <i>PdCHS-R</i>     | aaaagttctctctttagCTCACTGATTGTAATTGCAG     | SpeI                                  | stable transformation    |
| <i>PdTHC2'GT-F</i> | gaacacgggggactcttgacATGACGAAAGCAGAGTTAGTC | NcoI                                  | stable transformation    |
| <i>PdTHC2'GT-R</i> | aaaagttctctctttagGGGCATATTTGTATGACGTC     | SpeI                                  | stable transformation    |
| <i>PdCHI-F</i>     | gaacacgggggactcttgacATGGGTACTGAACAGGTAAT  | NcoI                                  | stable transformation    |
| <i>PdCHI-R</i>     | aaaagttctctctttagATAGTCATTTGTAGATAACT     | SpeI                                  | stable transformation    |
