# Supplementary material for: Sequence Analysis and Functional Verification of the Effects of Three Key Structural Genes, PdTHC2’GT, PdCHS and PdCHI, on the Isosalipurposide Synthesis Pathway in Paeonia delavayi var. lutea
Source: MDPI journal article supplement (doi:10.3390/ijms23105696), 2022-05-19
Supplement: s1 [file s1]

Table S1 Primers used for PCR and qRT-PCR

| Primer Name      | Forward primer(5' - 3')  | Reverse primer(5' - 3')  | Description |
|------------------|--------------------------|--------------------------|-------------|
| <i>PdTHC2'GT</i> | ATGACGAAAGCAGAGTTAGTC    | TTAGGGCATATTTTGTATGACGTC | PCR         |
| <i>PdCHS</i>     | ATGGCTTCAGTTGAAGAAATTCGA | TCACTCACTGATTGTAATTGCAGG | PCR         |
| <i>PdCHI</i>     | ATGGGTACTGAACAGGTAATG    | TCAATAGTCATTTGTAGATAAC   | PCR         |
| <i>PdTHC2'GT</i> | AGCAGACATTTGGCGTGGC      | TGCGCTCCAGTCCATTGCA      | qRT-PCR     |
| <i>PdCHS</i>     | ACATTTCGCGGACCTTCGGA     | TCAGCACCGACAATAACCGCA    | qRT-PCR     |
| <i>PdCHI</i>     | AGGAGCTGGCCGAAGATGACAA   | TCTCCAGTTGCACGCCATACT    | qRT-PCR     |
| <i>NiCHS</i>     | TTGGGCTGCAGAGACAAGCT     | TTGGGCTGCAGAGACAAGCT     | qRT-PCR     |
| <i>NiCHI</i>     | CCTGTTGGGGCATTGACGAT     | AGTCCTGACACTCTTTCGGCGA   | qRT-PCR     |
| <i>PsPP2A</i>    | CGTGTTTGGATGTTCTCAAGGC   | GGCGAGTGAGTTTTTCAGTTGGA  | qRT-PCR     |
| <i>NiCP</i>      | CACCACAAAGGGCAATCTCA     | CCGCCAGTCTTTCGTCTCC      | qRT-PCR     |
