# Supplementary material for: Sequence Analysis and Functional Verification of the Effects of Three Key Structural Genes, PdTHC2’GT, PdCHS and PdCHI, on the Isosalipurposide Synthesis Pathway in Paeonia delavayi var. lutea
Source: MDPI journal article supplement (doi:10.3390/ijms23105696), 2022-05-19
Supplement: s1 [file s1]

Table S2 Protein sequences used to construct phylogenetic trees

| Gene             | GenBank Number | Species                                      |
|------------------|----------------|----------------------------------------------|
| <i>CrTHC2'GT</i> | BAF75901.1     | <i>Catharanthus roseus</i>                   |
| <i>CpTHC2'GT</i> | BAF75895.1     | <i>Cyclamen persicum</i>                     |
| <i>DcTHC2'GT</i> | BAF75886.1     | <i>Dianthus caryophyllus</i>                 |
| <i>GmIF7GlcT</i> | NP_001235161.1 | <i>Glycine max</i>                           |
| <i>GelF7GlcT</i> | BAC78438.1     | <i>Glycyrrhiza echinata</i>                  |
| <i>Mt7GT</i>     | AAW56091       | <i>Medicago truncatula</i>                   |
| <i>Lb7GlcT</i>   | BAD06874       | <i>Lycium barbarum</i>                       |
| <i>SbF7GlcT</i>  | BAA83484.1     | <i>Scutellaria baicalensis</i>               |
| <i>Ih5GT</i>     | BAD06874       | <i>Iris × hollandica</i>                     |
| <i>PhA5GlcT</i>  | BAA89009.1     | <i>Petunia × hybrida</i>                     |
| <i>ThA5GlcT</i>  | BAC54093       | <i>Torenia hybrida</i>                       |
| <i>Per5GT</i>    | BAA36421       | <i>Perilla frutescens</i> var. <i>crispa</i> |
| <i>GhA5GlcT</i>  | Q9ZR25.1       | <i>Glandularia × hybrida</i>                 |
| <i>Gh5GT</i>     | BAA36423       | <i>Glandularia × hybrida</i>                 |
| <i>Dc3GT1</i>    | BAD52003.1     | <i>Dianthus caryophyllus</i>                 |
| <i>VmF3GalT</i>  | BAA36972.1     | <i>Vigna mungo</i>                           |
| <i>Ih3GT</i>     | BAD83701.1     | <i>Iris × hollandica</i>                     |
| <i>Hg3GT</i>     | P14726         | <i>Hordeum vulgare</i>                       |
| <i>ZmF3GT</i>    | P16165.1       | <i>Zea mays</i>                              |
